# Supplementary material for: Study of Fecal and Urinary Metabolite Perturbations Induced by Chronic Ethanol Treatment in Mice by UHPLC-MS/MS Targeted Profiling
Source: MDPI journal article supplement (doi:10.3390/metabo9100232), 2019-10-16
Supplement: s1 [file s1]

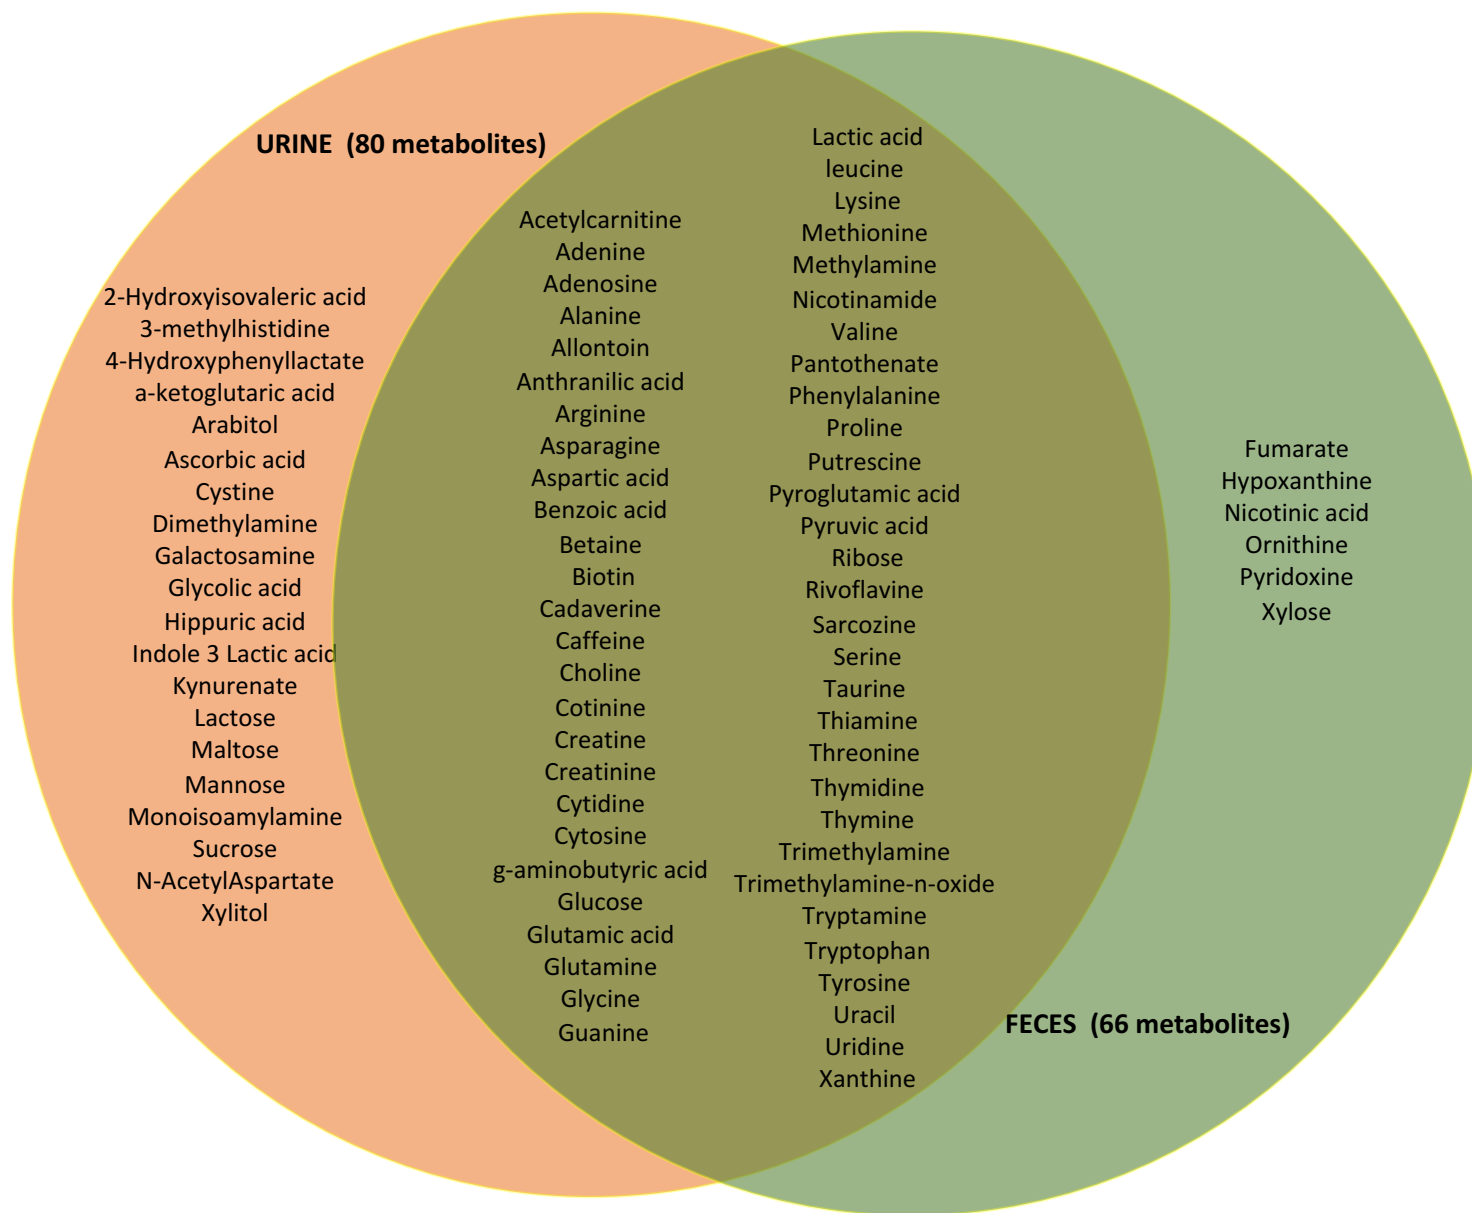

Sup Figure 1. Venn Diagram of detected metabolites in fecal and urine sample

## FECES

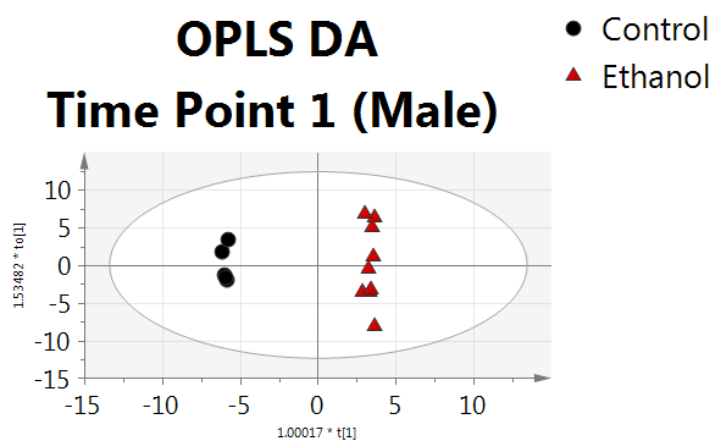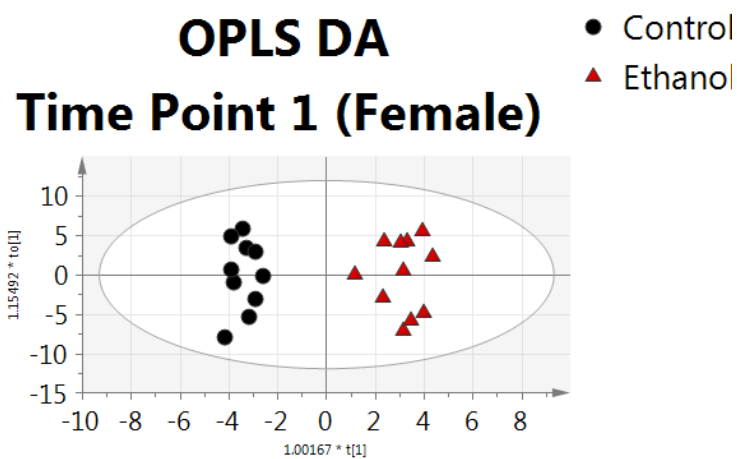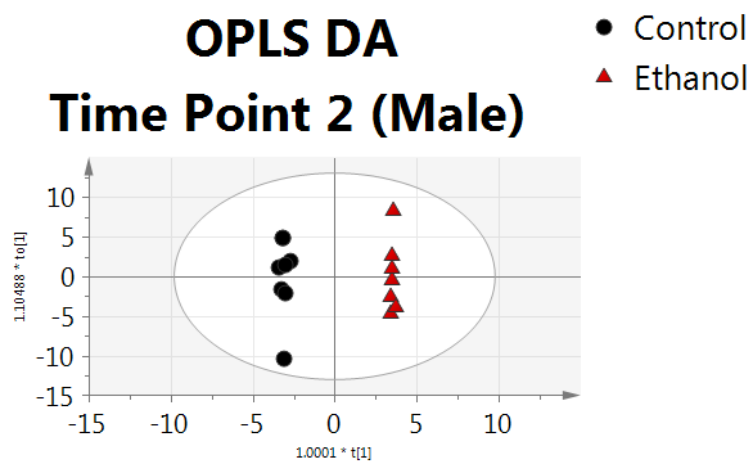

## URINE

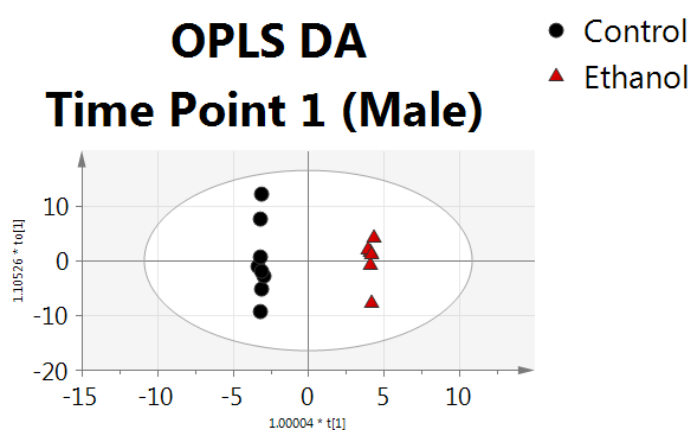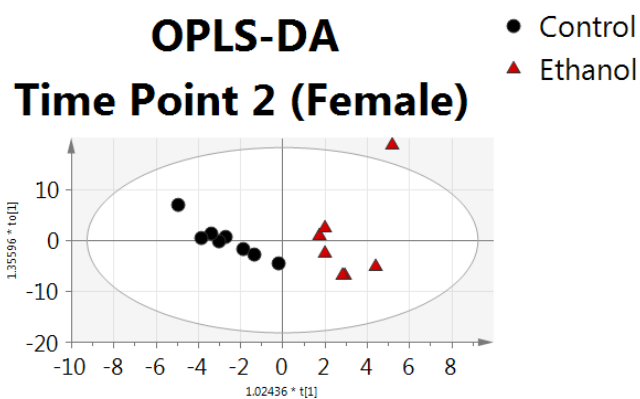

Figure S2: OPLS DA score plots of the models constructed for male and female mice samples separately, (x axis: first principal component  $t[1]$ , yaxis: the first component  $to[1]$ )

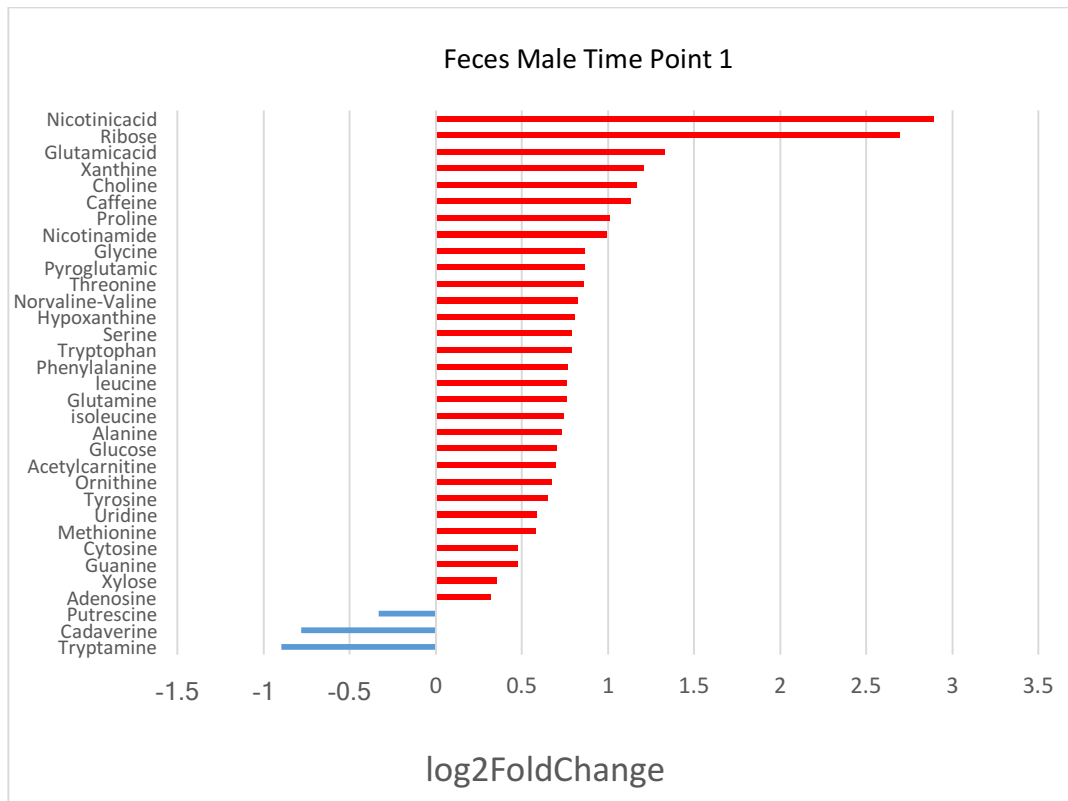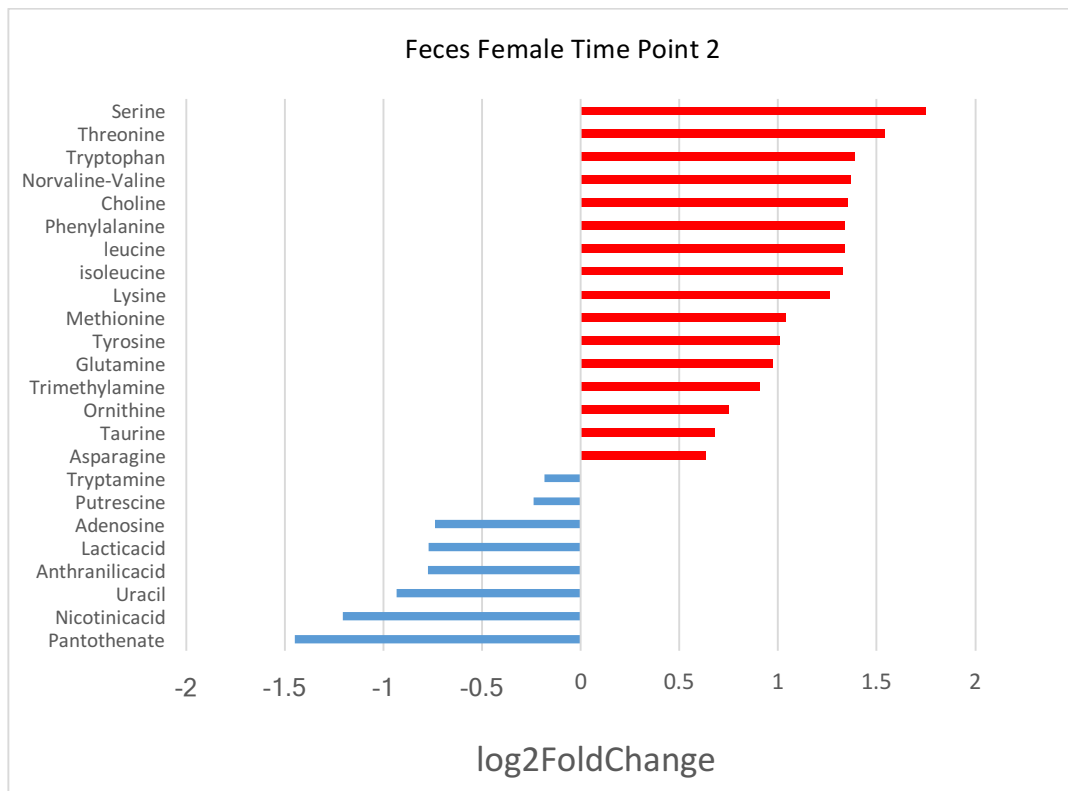

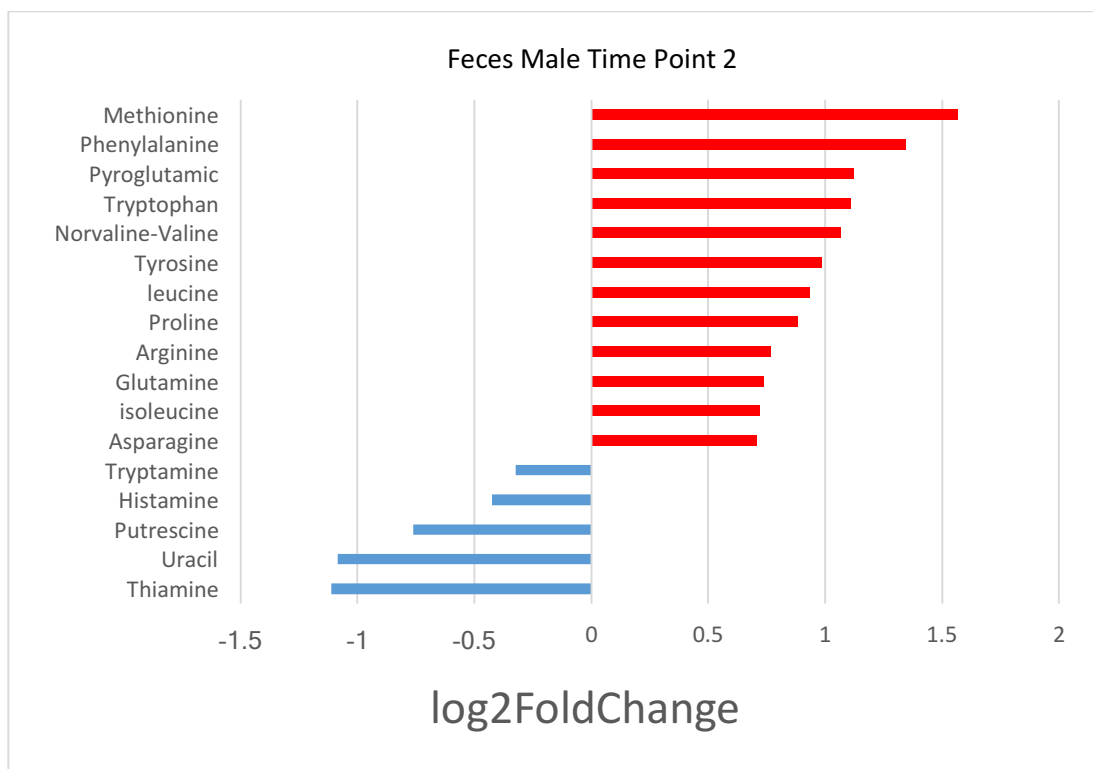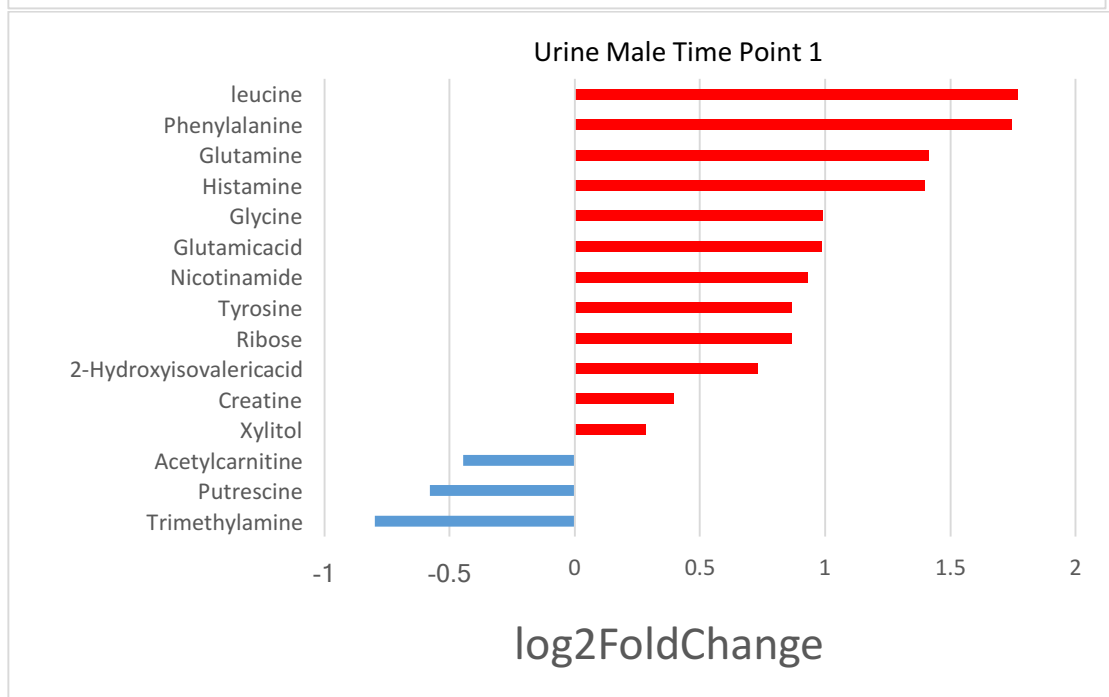

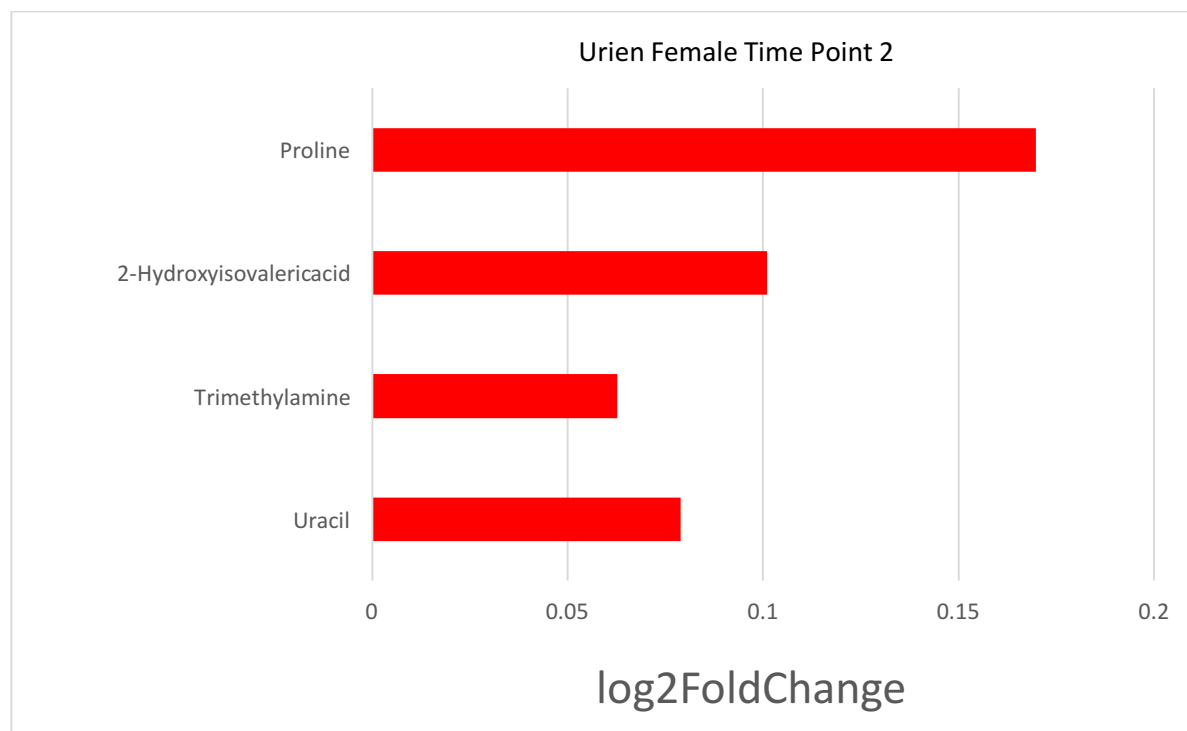

Figure S3: Bar plots of log2 Fold Change showing the altered metabolites ( $p < 0.05$ ) based on the models constructed for male and female mice separately (x axis: log2 fold change value, y axis: compound name)

Table S1: Differentiated metabolites from the analyzed fecal samples, their related biochemical pathway and their trend of groups and time points are presented.

|                                           |                                                                                                                                                             | <b>1<sup>st</sup><br/>Timepoint</b> | <b>2<sup>nd</sup><br/>Timepoint</b> |
|-------------------------------------------|-------------------------------------------------------------------------------------------------------------------------------------------------------------|-------------------------------------|-------------------------------------|
|                                           | <b>Potential Related Biochemical Pathways</b>                                                                                                               | Ethanol Group                       | Ethanol Group                       |
| Choline                                   | Glycine, serine and threonine metabolism                                                                                                                    |                                     | ↑                                   |
| Cytosine                                  | Pyrimidine metabolism                                                                                                                                       |                                     | ↑                                   |
| <b>D-Glucose</b>                          | Glycolysis / Gluconeogenesis, Pentose phosphate pathway                                                                                                     | ↑                                   | ↑                                   |
| D-Xylose                                  | Pentose and glucuronate interconversions                                                                                                                    |                                     | ↑                                   |
| Glycine                                   | Glycine, serine and threonine metabolism, Purine metabolism                                                                                                 |                                     | ↑                                   |
| Hypoxanthine                              | Purine metabolism                                                                                                                                           |                                     | ↑                                   |
| <b>L-Acetylcarnitine</b>                  | Fatty acid degradation                                                                                                                                      | ↓                                   | ↑                                   |
| L-Alanine                                 | Alanine, aspartate and glutamate metabolism                                                                                                                 |                                     | ↑                                   |
| L-Arginine                                | Arginine biosynthesis, Arginine and proline metabolism                                                                                                      | ↑                                   |                                     |
| <b>L-Asparagine</b>                       | Alanine, aspartate and glutamate metabolism                                                                                                                 | ↑                                   | ↑                                   |
| L-Aspartic acid                           | Alanine, aspartate and glutamate metabolism, Arginine biosynthesis                                                                                          |                                     | ↑                                   |
| <b>L-Glutamine</b>                        | Arginine biosynthesis, Purine metabolism, Pyrimidine metabolism, Alanine, aspartate and glutamate metabolism<br><br>/D-Glutamine and D-glutamate metabolism | ↑                                   | ↑                                   |
| <b>L-Isoleucine</b><br><b>/ L-Leucine</b> | Valine, leucine and isoleucine degradation/<br>biosynthesis                                                                                                 | ↑                                   | ↑                                   |
| L-Lactic acid                             | Glycolysis / Gluconeogenesis, Fructose and mannose metabolism, Pyruvate metabolism                                                                          | ↓                                   |                                     |

|                        |                                                                                                                      |   |   |
|------------------------|----------------------------------------------------------------------------------------------------------------------|---|---|
| <b>L-Lysine</b>        | Lysine biosynthesis/ degradation                                                                                     | ↑ | ↑ |
| L-Methionine           | Cysteine and methionine metabolism                                                                                   |   | ↑ |
| <b>L-Phenylalanine</b> | Phenylalanine metabolism, Phenylalanine, tyrosine and tryptophan biosynthesis                                        | ↑ | ↑ |
| <b>L-Proline</b>       | Arginine and proline metabolism                                                                                      | ↑ | ↑ |
| L-Serine               | Glycine, serine and threonine metabolism                                                                             |   | ↑ |
| L-Threonine            | Glycine, serine and threonine metabolism                                                                             |   | ↑ |
| <b>L-Tryptophan</b>    | Glycine, serine and threonine metabolism, Tryptophan metabolism, Phenylalanine, tyrosine and tryptophan biosynthesis | ↑ | ↑ |
| <b>L-Tyrosine</b>      | Tyrosine metabolism, Phenylalanine metabolism, Phenylalanine, tyrosine and tryptophan biosynthesis                   | ↑ | ↑ |
| <b>L-Valine</b>        | Valine, leucine and isoleucine degradation/ biosynthesis                                                             | ↑ | ↑ |
| Methylamine            | Methane metabolism                                                                                                   |   | ↑ |
| Niacinamide            | Nicotinate and nicotinamide metabolism                                                                               |   | ↑ |
| Nicotinic acid         | Nicotinate and nicotinamide metabolism                                                                               | ↓ |   |
| <b>Ornithine</b>       | Arginine biosynthesis, Arginine and proline metabolism                                                               | ↑ | ↑ |
| <b>Putrescine</b>      | Arginine and proline metabolism                                                                                      | ↓ | ↑ |
| Pyroglutamic acid      | Glutathione metabolism                                                                                               |   | ↑ |
| Taurine                | Taurine and hypotaurine metabolism, Primary bile acid biosynthesis,                                                  |   | ↑ |
| <b>Thiamine</b>        | Thiamine metabolism                                                                                                  | ↓ | ↓ |
| Trimethylamine         | Methane metabolism                                                                                                   |   | ↑ |
| <b>Tryptamine</b>      | Tryptophan metabolism                                                                                                | ↓ | ↑ |
| <b>Uracil</b>          | Pyrimidine metabolism                                                                                                | ↓ | ↓ |
| Uridine                | Pyrimidine metabolism                                                                                                | ↑ |   |

Table S2: Differentiated metabolites from the analyzed urine samples, their related biochemical pathway and their trend of groups and time points are presented.

|                                     |                                                                                                                                                         | <b>1<sup>st</sup><br/>Timepoint</b> | <b>2<sup>nd</sup><br/>Timepoint</b> |
|-------------------------------------|---------------------------------------------------------------------------------------------------------------------------------------------------------|-------------------------------------|-------------------------------------|
|                                     | <b>Potential Related Biochemical Pathways</b>                                                                                                           | Ethanol Group                       | Ethanol Group                       |
| <b>(S)-3-Hydroxyisobutyric acid</b> | Valine, leucine and isoleucine degradation                                                                                                              | ↑                                   | ↑                                   |
| Cadaverine                          | Lysine degradation, Glutathione metabolism                                                                                                              | ↓                                   |                                     |
| D-Maltose                           | Starch and sucrose metabolism                                                                                                                           | ↑                                   |                                     |
| <b>D-Ribose</b>                     | Pentose phosphate pathway                                                                                                                               | ↑                                   | ↑                                   |
| Glycine                             | Glycine, serine and threonine metabolism, Purine metabolism                                                                                             |                                     | ↑                                   |
| Guanine                             | Purine metabolism                                                                                                                                       | ↑                                   |                                     |
| <b>Hydroxyphenyllactic acid</b>     | Tyrosine metabolism                                                                                                                                     | ↑                                   | ↑                                   |
| <b>Indolelactic acid</b>            | Tryptophan metabolism                                                                                                                                   | ↑                                   | ↑                                   |
| L-Acetylcarnitine                   | Fatty acid degradation                                                                                                                                  |                                     | ↑                                   |
| L-Cystine                           | Cysteine and methionine metabolism                                                                                                                      | ↑                                   |                                     |
| L-Glutamic acid                     | Arginine biosynthesis, Alanine, aspartate and glutamate metabolism, Arginine and proline metabolism                                                     |                                     | ↑                                   |
| L-Glutamine                         | Arginine biosynthesis, Purine metabolism, Pyrimidine metabolism, Alanine, aspartate and glutamate metabolism<br>/D-Glutamine and D-glutamate metabolism |                                     | ↑                                   |
| <b>L-Isoleucine/L-isoleucine</b>    | Valine, leucine and isoleucine degradation/ biosynthesis                                                                                                | ↑                                   | ↑                                   |
| Niacinamide                         | Nicotinate and nicotinamide metabolism                                                                                                                  |                                     | ↑                                   |

|                        |                                 |   |   |
|------------------------|---------------------------------|---|---|
| Putrescine             | Arginine and proline metabolism |   | ↓ |
| Pyroglutamic acid      | Glutathione metabolism          |   | ↑ |
| <b>Trimethylamine</b>  | Methane metabolism              | ↓ | ↓ |
| Trimethylamine N-oxide | Methane metabolism              | ↑ |   |
| Uracil                 | Pyrimidine metabolism           | ↓ |   |
